# Supplementary material for: Luminescence properties of mixed-ligand MOFs containing fluorene scaffolds functionalized with isonicotinoyl arms
Source: Royal Society of Chemistry journal article supplement (doi:10.1039/d3ce00087g), 2023-01-01
Supplement: d3ce00087g1.pdf [file d3ce00087g1.pdf]

## Supporting Information

# Luminescent properties of mixed-ligand MOFs containing fluorene scaffolds functionalized with isonicotinoyl arms

Andrea Delledonne,<sup>a</sup> Martina Orlandini,<sup>a</sup> Francesca Terenziani,<sup>a\*</sup> Paolo Pio Mazzeo,<sup>a</sup> Alessia Bacchi,<sup>a</sup> Lucia Carlucci,<sup>b</sup> Angiolina Comotti,<sup>c</sup> Jacopo Peregoc and Paolo Pelagatti,<sup>d\*</sup>

<sup>a</sup> Dipartimento di Scienze Chimiche, della Vita e della Sostenibilità Ambientale, Università di Parma, Parco Area delle Scienze 17/A, 43124 Parma, Italy

<sup>b</sup> Department of Chemistry, Università degli Studi di Milano, via Golgi 19, 20133 Milano, Italy

<sup>c</sup> Department of Materials Science, University of Milano-Bicocca, via Roberto Cozzi 55, 20125 Milano, Italy

<sup>d</sup> Interuniversity Consortium Chemical Reactivity and Catalysis (CIRCC), via Celso Ulpiani 27, 70126 Bari, Italy

[paolo.pelagatti@unipr.it](mailto:paolo.pelagatti@unipr.it)

[francesca.terenziani@unipr.it](mailto:francesca.terenziani@unipr.it)

## Content

|                                                            |             |
|------------------------------------------------------------|-------------|
| <sup>1</sup> H NMR analysis (Figures S1-S3)                | pages 2-3   |
| TGA analysis (Figures S4-S6)                               | pages 4-5   |
| Crystallography (Figures S7-S9)                            | pages 6-7   |
| Topological analysis (Figure S10)                          | page 8      |
| PUM310 activation (Figure S11)                             | page 9      |
| Volumetric adsorption properties (Figures S12-S13)         | page 9-10   |
| Luminescence and UV-vis characterization (Figures S14-S15) | pages 11-12 |

## <sup>1</sup>H NMR analysis

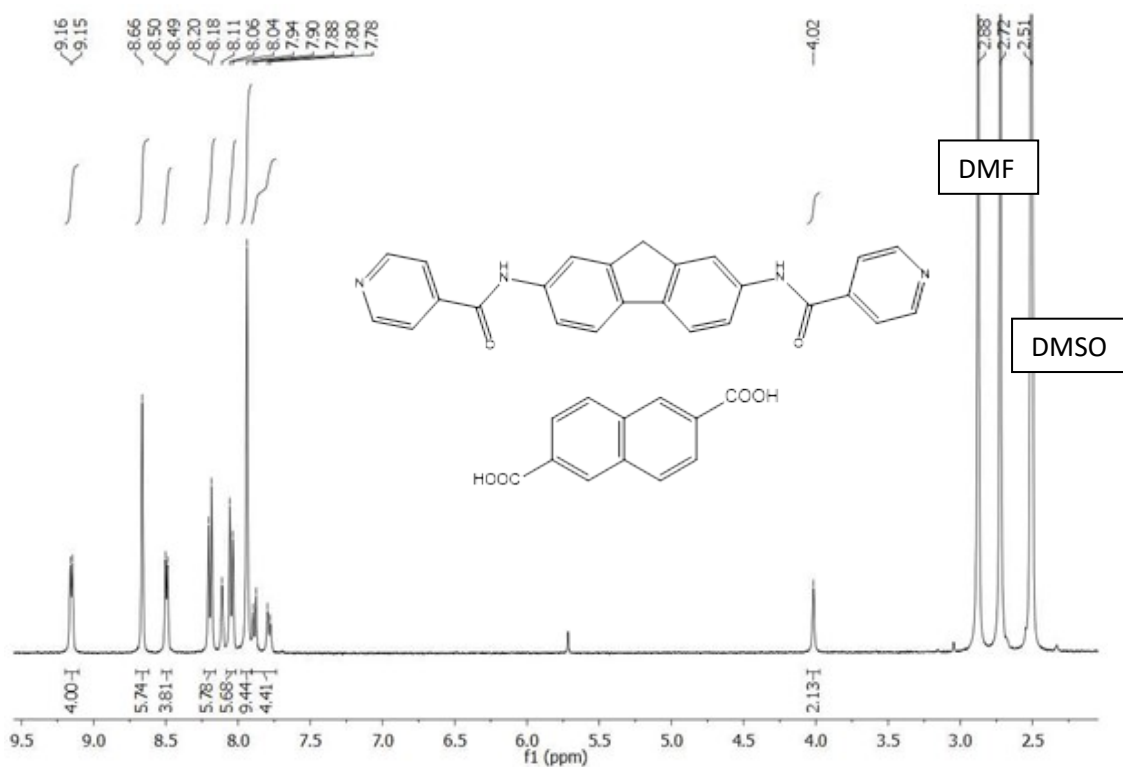

**Figure S1** <sup>1</sup>H NMR spectrum of PUM310 crystals after digestion in TFA-d. Spectrum recorded at 25°C after dilution with DMSO-d.

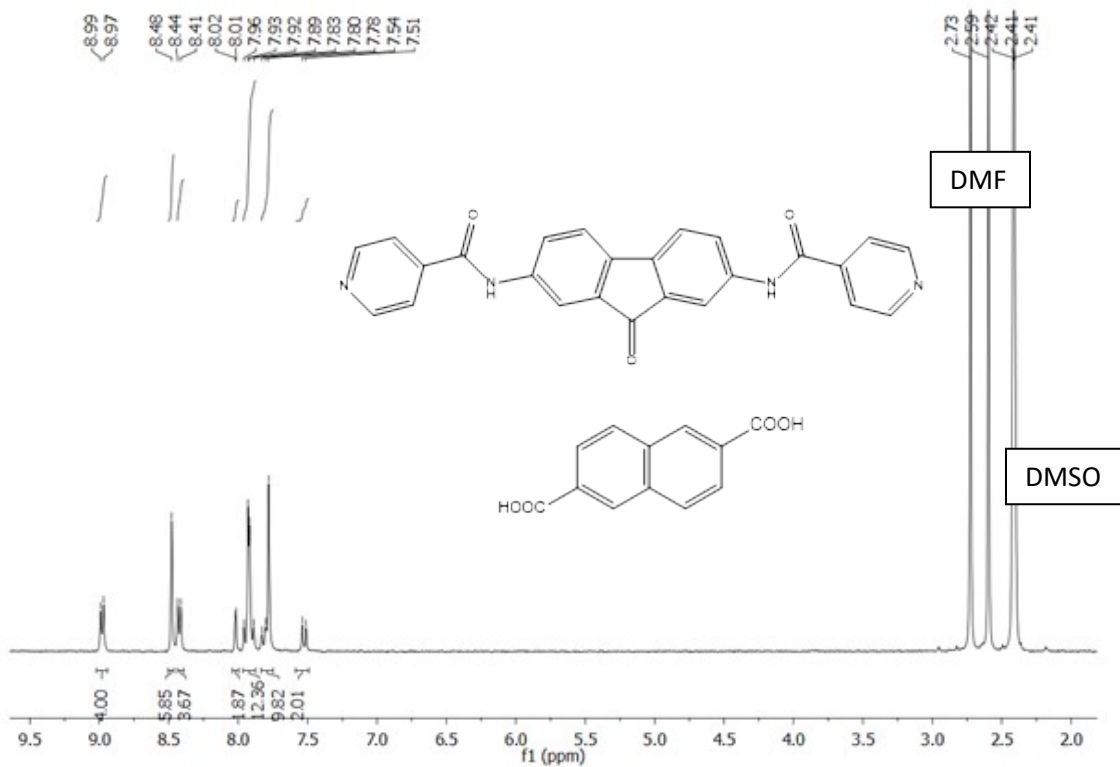

**Figure S2** <sup>1</sup>H NMR spectrum of PUM310CO crystals after digestion in TFA-d. Spectrum recorded at 25°C after dilution with DMSO-d.

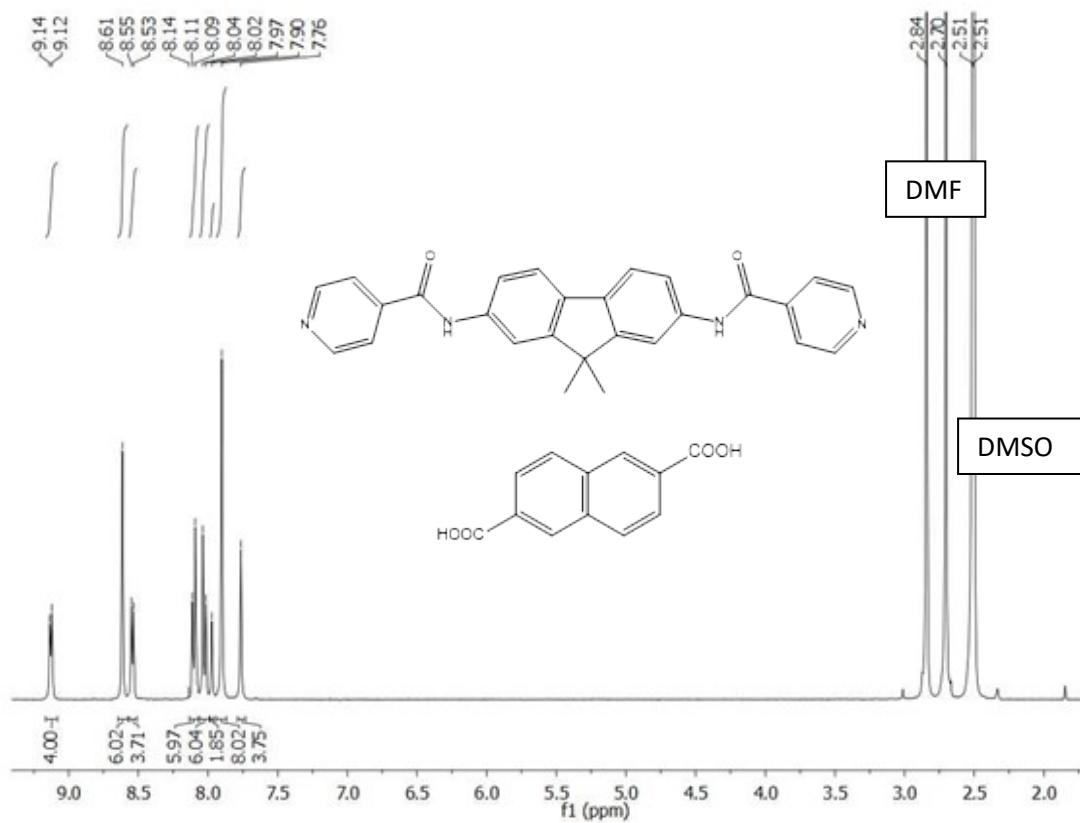

**Figure S3**  $^1\text{H}$  NMR spectrum of  $\text{PUM310Me}_2$  crystals after digestion in  $\text{TFA-d}$ . Spectrum recorded at  $25^\circ\text{C}$  after dilution with  $\text{DMSO-d}$ .

## TGA analyses

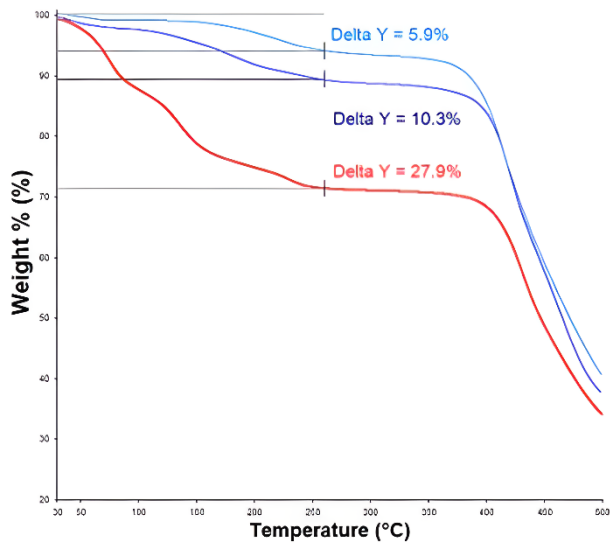

Figure S4 TGA trace of PUM310 (red), PUM310-a (blue) and PUM310-a' (light blue).

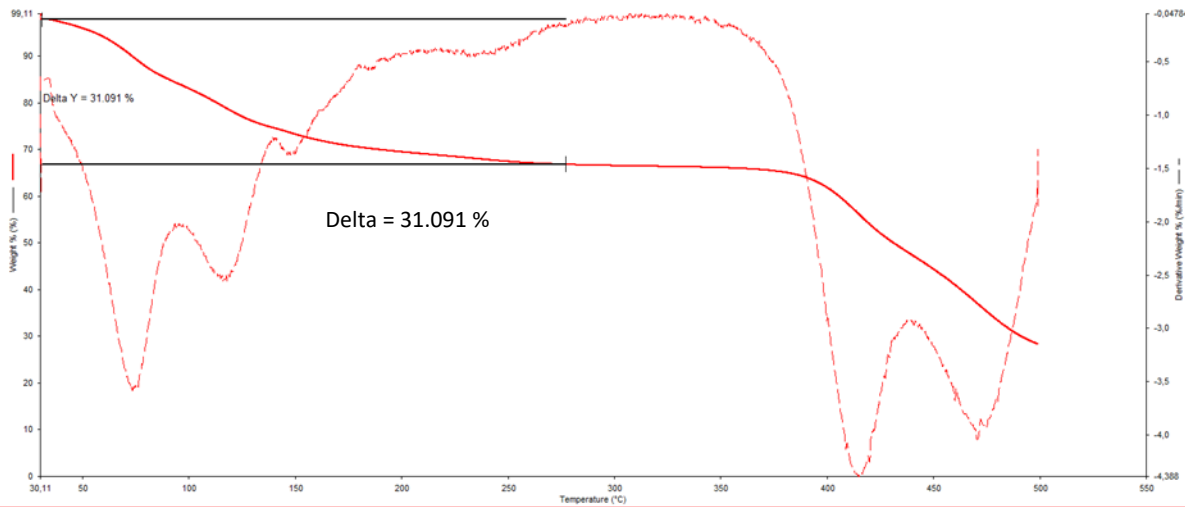

Figure S5 TGA trace of PUM310CO.

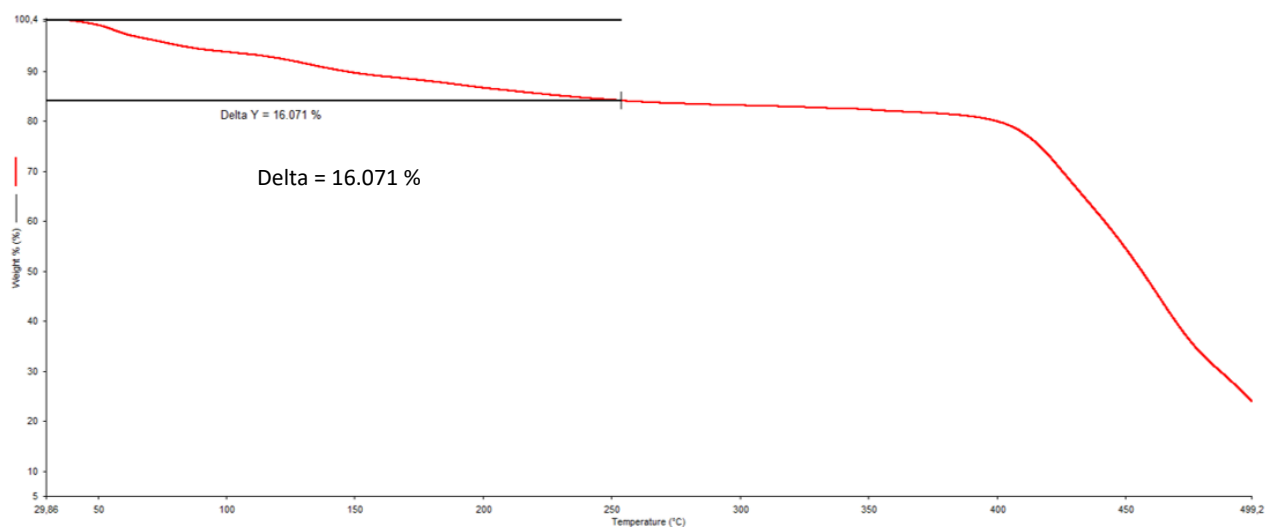

**Figure S6** TGA trace of **PUM310Me<sub>2</sub>**.

## Crystallography

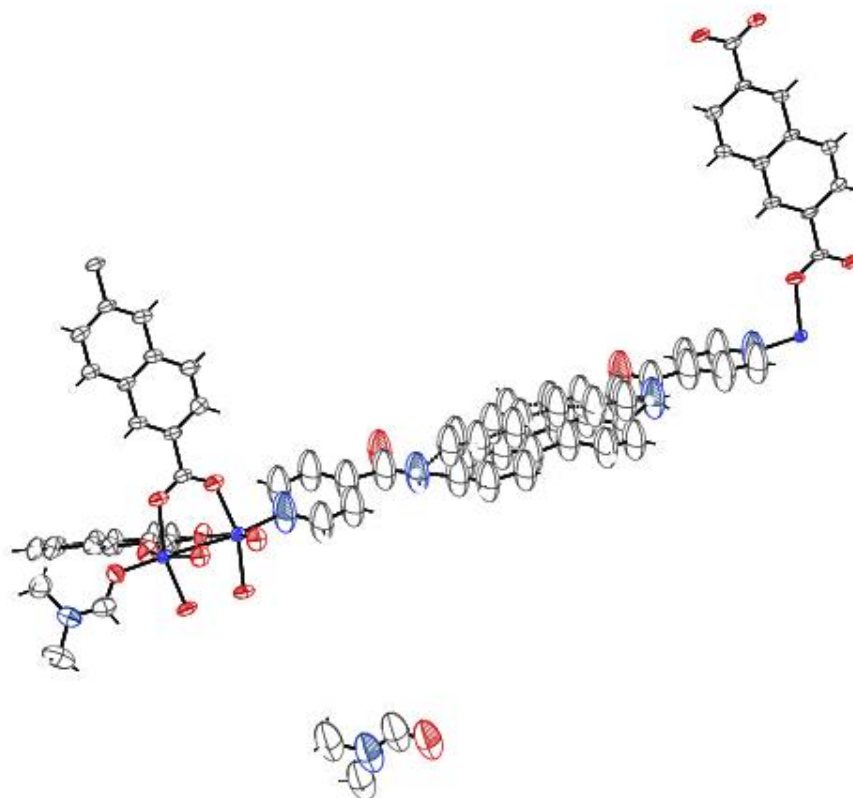

**Figure S7** Ortep drawing of the ASU of **PUM310**. All non-hydrogen atoms are shown as ellipsoids at the 50% probability level. H atoms (isotropically refined) are reported in capped-stick style for the sake of clarity. Colour code: red=O, blue=N, white=C.

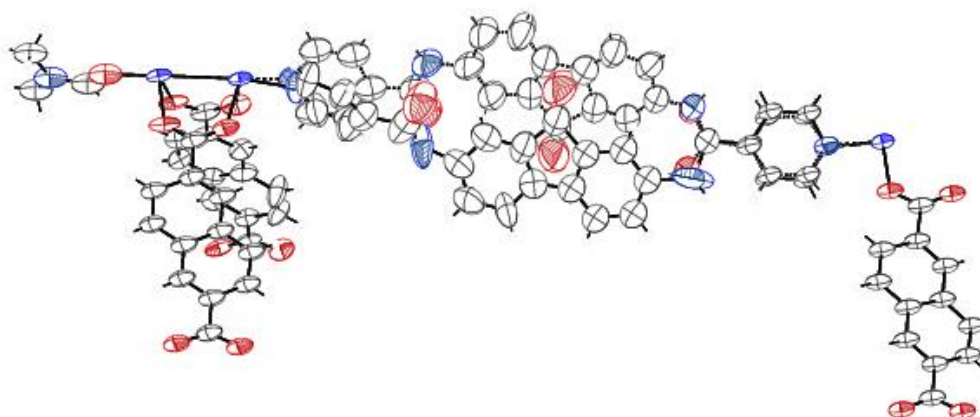

**Figure S8** Ortep drawing of the ASU of **PUM310CO**. All non-hydrogen atoms are shown as ellipsoids at the 50% probability level. H atoms (isotropically refined) are reported in capped-stick style for the sake of clarity. Colour code: red=O, blue=N, white=C. Disordered ligand is reported for completeness.

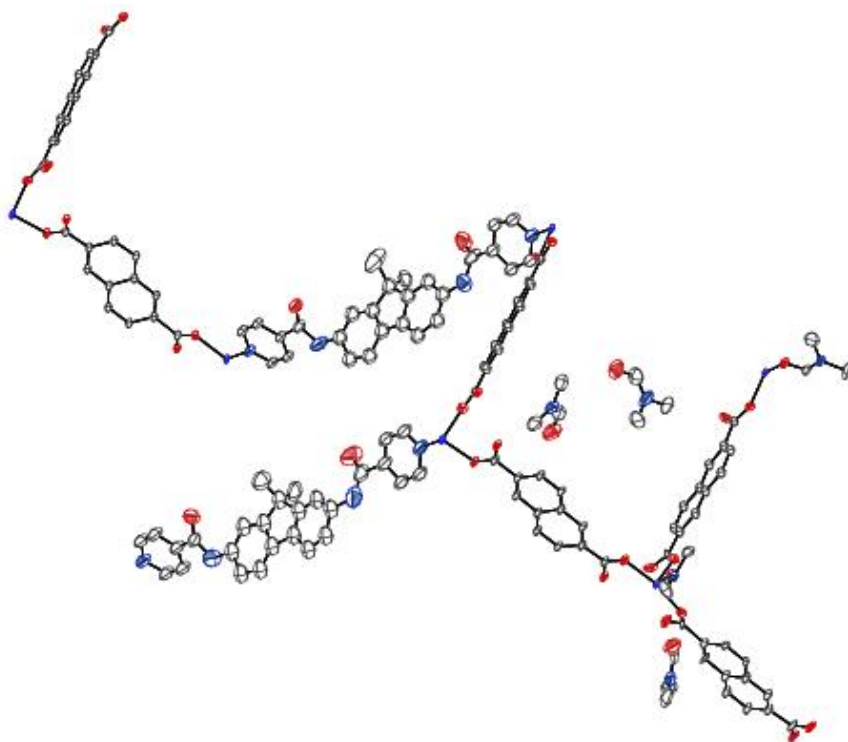

**Figure S9** Ortep drawing of the ASU of **PUM310Me<sub>2</sub>**. All non-hydrogen atoms are shown as ellipsoids at the 50% probability level. H atoms (isotropically refined) are reported in capped-stick style for the sake of clarity. Colour code: red=O, blue=N, white=C.

## Topological analysis

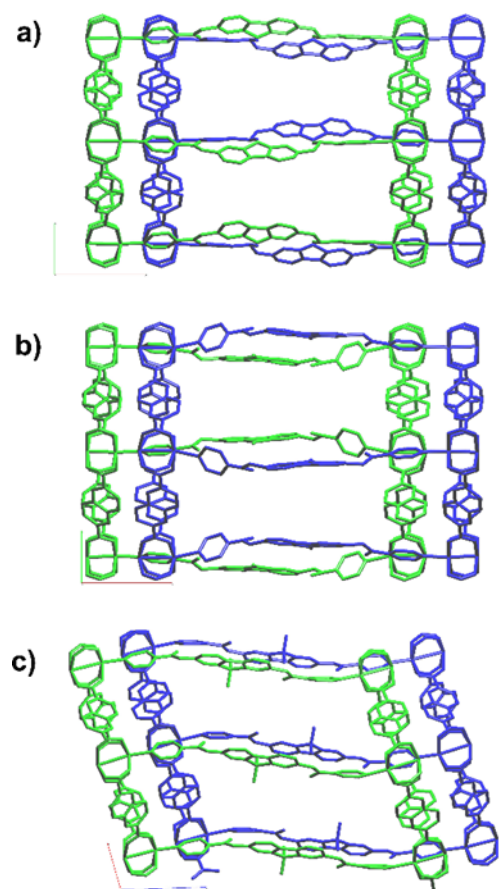

**Figure S10** Molecular views of two catenated cubic cages of the thick layers in (a) **PUM310**, (b) **PUM310CO** and (c) **PUM310Me<sub>2</sub>** showing the arrangement of the ligands in the three structures.



## MOF activation-XRPD analysis

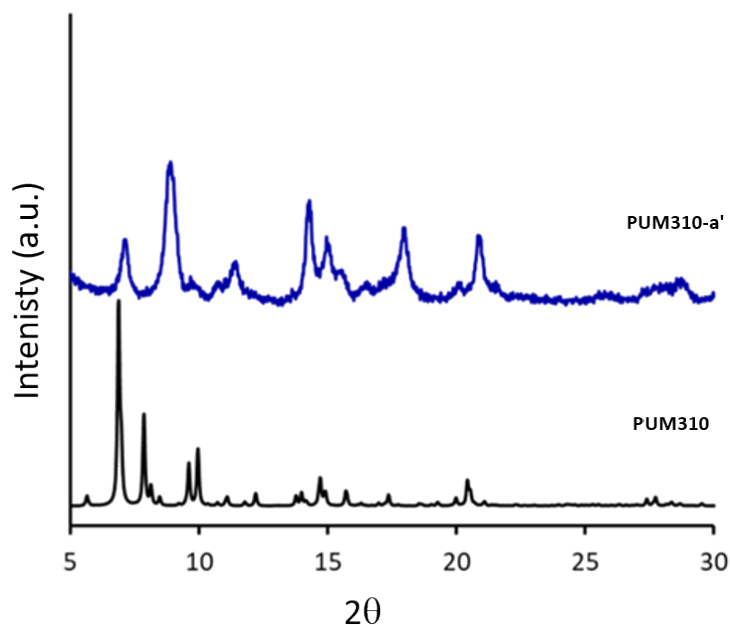

**Figure S11** Comparison between the calculated XRPD trace of **PUM310** (black) and **PUM310-a'** (blue).

## Volumetric adsorption properties

**PUM310**, **PUM310CO** and **PUM310Me<sub>2</sub>** were subjected to N<sub>2</sub> and CO<sub>2</sub> adsorption isotherm analyses.

N<sub>2</sub> adsorption isotherms at 77 K and CO<sub>2</sub> adsorption isotherms at 195 K were collected up to 1 bar using Micromeritics analyser ASAP2020 HD. **PUM310Me<sub>2</sub>** was previously activated at 70°C under dynamic vacuum for 5 hours, then overnight under dynamic vacuum before the collection of N<sub>2</sub> and CO<sub>2</sub> isotherms. **PUM310** underwent a thermal treatment at 70°C under dynamic vacuum for 2h, then at 60°C for 30 min and outgassing overnight under dynamic vacuum before gas adsorption measurements.

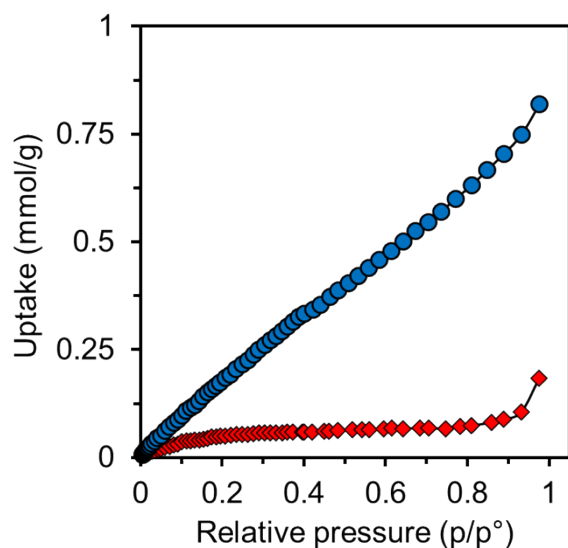

**Figure S12** N<sub>2</sub> adsorption isotherms, collected at 77 K, of **PUM310** (red diamonds) and **PUM310Me<sub>2</sub>** (blue circles).

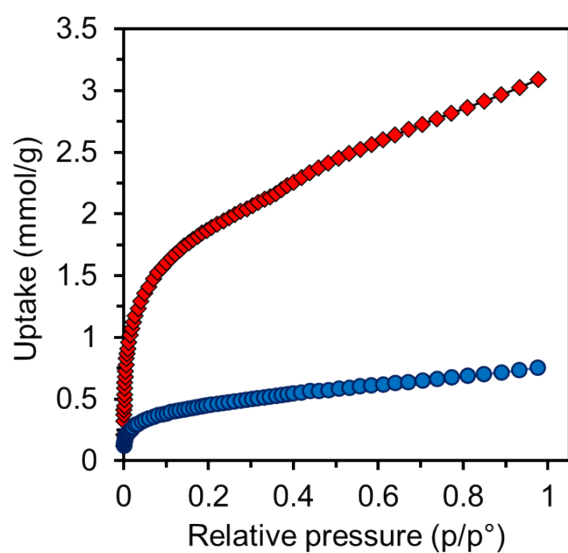

**Figure S13** CO<sub>2</sub> adsorption isotherms, collected at 195 K, of **PUM310** (red diamonds) and **PUM310Me<sub>2</sub>** (blue circles).

| Sample                      | CO <sub>2</sub> adsorption at 0.98 p/p°<br>(mmol/g) |
|-----------------------------|-----------------------------------------------------|
| <b>PUM310</b>               | 3.09                                                |
| <b>PUM310Me<sub>2</sub></b> | 0.76                                                |

For **PUM310CO** no significant results were obtained.

## Luminescence and UV-vis characterization

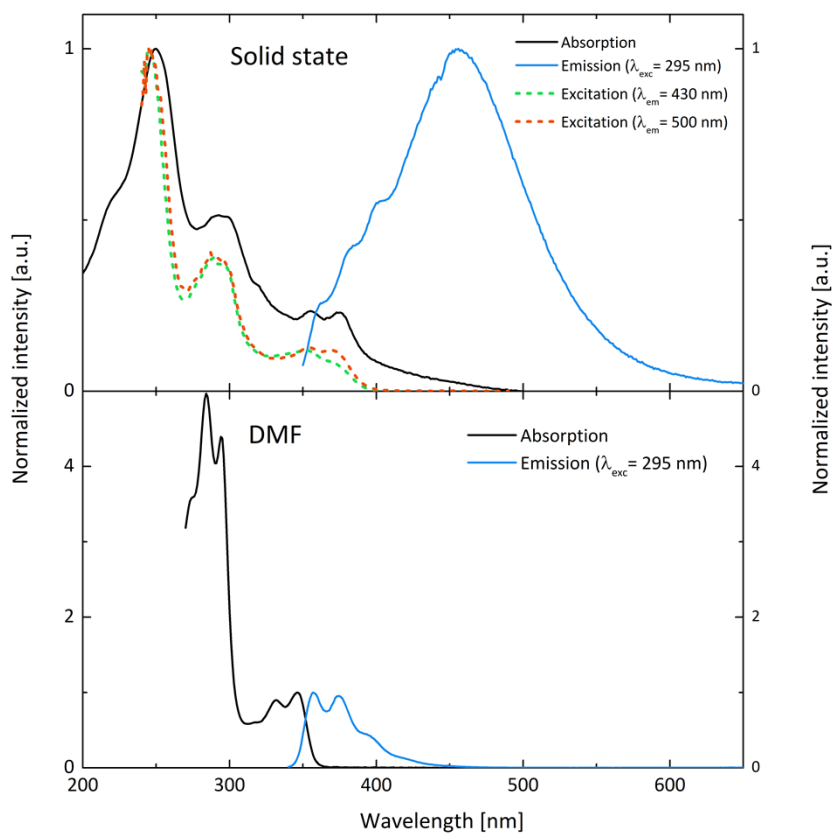

**Figure S14** Top: solid state absorption, fluorescence emission and excitation spectra of H<sub>2</sub>ndca. Bottom: absorption and emission spectra of H<sub>2</sub>ndca in DMF. The corresponding excitation and emission wavelengths are reported in the legend.

The emission spectrum recorded on a thin film of ground powders of H<sub>2</sub>ndca is characterized by a broad emission band peaked at 450 nm, which is absent in the spectrum of H<sub>2</sub>ndca in solution, and could be due to the formation of excimer species. In the solid-state emission spectrum, a reminder of the emission band of H<sub>2</sub>ndca in solution is observed, recognizable thanks to the vibronic peaks (350-400 nm spectral region).

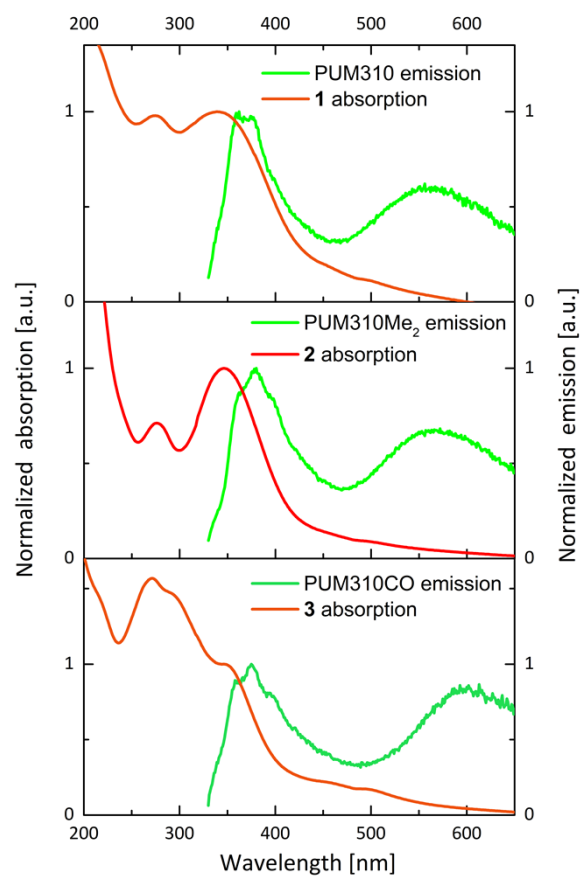

**Figure S15** Comparison between solid state absorption of **1**, **2**, **3** (from top to bottom) and emission of H<sub>2</sub>ndca when incorporated in the corresponding MOFs structure.
